# Supplementary material for: Comparison of the Incidence of Postoperative Acute Kidney Injury Following the Administration of Remimazolam or Sevoflurane in Elderly Patients Undergoing Total Knee Arthroplasty: A Randomized Controlled Trial
Source: MDPI journal article supplement (doi:10.3390/jpm13050789), 2023-05-01
Supplement: s1 [file s1]

**Table S1.** Heart rate at different perioperative phages.

|                        | RMMZ (n=39) | SEVO (n=39) | <i>p</i> -Value |
|------------------------|-------------|-------------|-----------------|
| Initial                | 76.9 ± 12.8 | 73.2 ± 11.2 | 0.176           |
| Before intubation      | 81.6 ± 11.3 | 78.9 ± 13.8 | 0.340           |
| 3 min after intubation | 86.0 ± 13.1 | 78.8 ± 13.9 | 0.021*          |
| Skin incision          | 82.1 ± 13.9 | 81.7 ± 12.5 | 0.898           |
| 30 min after incision  | 77.2 ± 12.7 | 71.8 ± 10.7 | 0.045*          |
| 1 h after incision     | 76.3 ± 13.0 | 67.5 ± 9.3  | 0.001*          |
| Tourniquet deflation   | 80.6 ± 11.8 | 66.9 ± 11.3 | < 0.001*        |
| PACU                   | 79.3 ± 15.5 | 76.1 ± 12.8 | 0.319           |

Data denote means ± standard deviations. \* Statistical significance. RMMZ, remimazolam; SEVO, sevoflurane; PACU, post-anesthetic care unit.

**Table S2.** Blood pressure at different perioperative phases.

|                          | RMMZ (n=39)  | SEVO (n=39)  | <i>p</i> -Value |
|--------------------------|--------------|--------------|-----------------|
| Systolic blood pressure  |              |              |                 |
| Initial                  | 160.5 ± 18.7 | 160.8 ± 22.5 | 0.957           |
| Before intubation        | 145.2 ± 17.8 | 131.3 ± 27.9 | 0.011*          |
| 3 min after intubation   | 145.2 ± 28.2 | 117.8 ± 21.6 | < 0.001*        |
| Skin incision            | 158.8 ± 19.1 | 155.6 ± 20.5 | 0.473           |
| 30 min after incision    | 134.9 ± 17.0 | 116.6 ± 14.6 | < 0.001*        |
| 1 h after incision       | 140.2 ± 14.5 | 118.3 ± 14.8 | < 0.001*        |
| Tourniquet deflation     | 114.9 ± 19.0 | 106.7 ± 17.3 | 0.050           |
| PACU                     | 157.3 ± 19.8 | 157.4 ± 28.2 | 0.993           |
| Mean blood pressure      |              |              |                 |
| Initial                  | 111.2 ± 12.7 | 106.6 ± 15.8 | 0.165           |
| Before intubation        | 105.1 ± 12.6 | 97.0 ± 19.7  | 0.034*          |
| 3 min after intubation   | 106.8 ± 19.4 | 87.0 ± 22.6  | < 0.001*        |
| Skin incision            | 115.8 ± 15.4 | 114.1 ± 14.9 | 0.618           |
| 30 min after incision    | 97.3 ± 13.0  | 85.0 ± 10.2  | < 0.001*        |
| 1 h after incision       | 99.6 ± 11.1  | 86.9 ± 10.8  | < 0.001*        |
| Tourniquet deflation     | 81.5 ± 14.0  | 78.1 ± 12.8  | 0.273           |
| PACU                     | 110.8 ± 12.9 | 109.4 ± 17.3 | 0.685           |
| Diastolic blood pressure |              |              |                 |
| Initial                  | 88.4 ± 11.4  | 86.1 ± 11.5  | 0.360           |
| Before intubation        | 85.8 ± 12.4  | 80.0 ± 14.8  | 0.064           |
| 3 min after intubation   | 87.4 ± 17.9  | 75.6 ± 18.9  | 0.006*          |
| Skin incision            | 94.5 ± 12.5  | 97.3 ± 13.4  | 0.345           |
| 30 min after incision    | 78.5 ± 11.7  | 71.4 ± 8.8   | 0.003*          |
| 1 h after incision       | 80.1 ± 10.9  | 72.4 ± 8.7   | 0.001*          |
| Tourniquet deflation     | 65.0 ± 11.7  | 63.6 ± 11.0  | 0.578           |
| PACU                     | 86.5 ± 11.8  | 85.0 ± 13.8  | 0.610           |

Data denote means ± standard deviations. \* Statistical significance. RMMZ, remimazolam; SEVO, sevoflurane; PACU, post-anesthetic care unit.

**Table S3.** Incidence of postoperative complications.

|                                      | RMMZ (n=39) | SEVO (n=39) | <i>p</i> -Value |
|--------------------------------------|-------------|-------------|-----------------|
| Postoperative kidney injury          | 5 (12.8%)   | 4 (10.3%)   | 1.000           |
| Postoperative urinary retention      | 26 (66.7%)  | 28 (71.8%)  | 0.806           |
| Postoperative nausea vomiting        | 15 (38.5%)  | 20 (51.3%)  | 0.362           |
| Postoperative pulmonary complication | 6 (15.4%)   | 5 (12.8%)   | 1.000           |
| Delirium                             | 5 (12.8%)   | 2 (5.1%)    | 0.428           |

Data denote numbers (%). RMMZ, remimazolam; SEVO, sevoflurane.
